# Supplementary material
Source: PubMed Central journal article supplement (PMC7960169)
Supplement: 15-00818.pdf [file 15-00818.pdf]

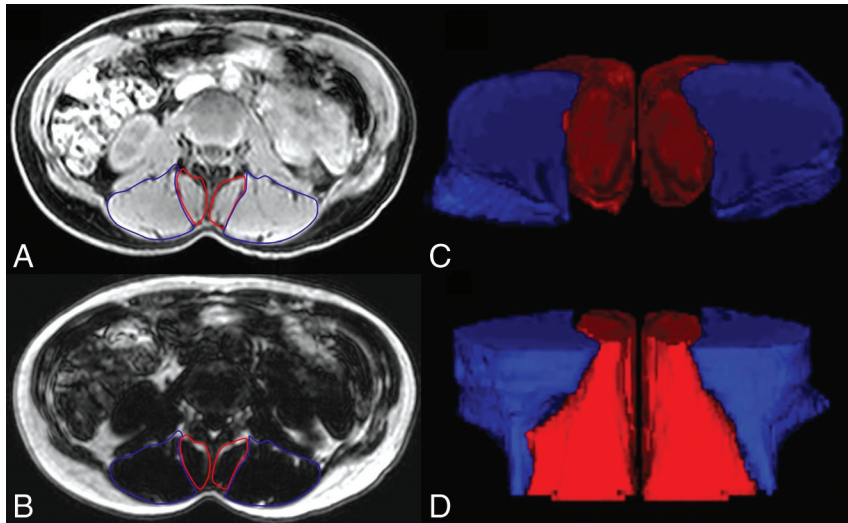

**ON-LINE FIGURE.** Paired water (A) and fat (B) separated axial 2-point Dixon images at L3 from a 33-year-old healthy female volunteer. ROIs defining multifidus (red) and erector spinae (longissimus and iliocostalis, blue) muscles are indicated. 3D images (C, viewed superiorly, D, viewed posteriorly) represent volumetric data for the right and left paravertebral muscles spanning L4 and L5 in the same volunteer.

**On-line Table 1: Fat signal fraction (%) for lumbar multifidus and erector spinae muscles, according to sex, age group, and lumbar level<sup>a</sup>**

| Lumbar Level | 20–29 Years | 30–39 Years | 40–49 Years | 50–62 Years | All Age Groups |
|--------------|-------------|-------------|-------------|-------------|----------------|
| Women        |             |             |             |             |                |
| MF + ES      |             |             |             |             |                |
| L1           | 9.1 ± 2.4   | 10.3 ± 2.3  | 10.5 ± 2.5  | 13.2 ± 7.5  | 10.7 ± 4.3     |
| L2           | 8.9 ± 2.2   | 10.7 ± 3.4  | 10.0 ± 2.6  | 13.7 ± 8.6  | 10.8 ± 4.9     |
| L3           | 10.9 ± 1.9  | 13.7 ± 4.7  | 14.5 ± 5.0  | 16.4 ± 9.3  | 13.9 ± 6.0     |
| L4           | 17.9 ± 3.7  | 21.1 ± 8.9  | 21.9 ± 8.0  | 23.7 ± 13.6 | 21.2 ± 9.2     |
| L5           | 29.9 ± 5.4  | 30.2 ± 10.3 | 31.6 ± 7.0  | 35.9 ± 13.0 | 31.9 ± 9.3     |
| All (L1–L5)  | 15.4 ± 2.6  | 17.7 ± 5.5  | 18.0 ± 4.6  | 20.7 ± 9.8  | 17.8 ± 10.7    |
| MF           |             |             |             |             |                |
| L1           | 16.5 ± 5.7  | 18.9 ± 3.8  | 21.9 ± 7.7  | 23.9 ± 8.6  | 20.2 ± 7.0     |
| L2           | 12.9 ± 4.8  | 16.6 ± 4.0  | 15.9 ± 4.6  | 20.2 ± 10.0 | 16.3 ± 6.5     |
| L3           | 14.5 ± 3.7  | 18.8 ± 5.9  | 20.3 ± 7.9  | 19.9 ± 10.5 | 18.4 ± 7.5     |
| L4           | 18.6 ± 3.9  | 23.1 ± 8.0  | 24.5 ± 8.5  | 24.7 ± 13.4 | 22.7 ± 9.1     |
| L5           | 27.9 ± 6.2  | 27.9 ± 9.6  | 29.7 ± 6.8  | 33.9 ± 13.0 | 29.9 ± 9.3     |
| All (L1–L5)  | 20.2 ± 4.2  | 23.0 ± 7.0  | 24.2 ± 6.3  | 26.0 ± 10.9 | 23.4 ± 7.5     |
| ES           |             |             |             |             |                |
| L1           | 7.3 ± 2.0   | 8.2 ± 2.6   | 7.8 ± 1.7   | 10.8 ± 7.4  | 8.5 ± 4.0      |
| L2           | 7.6 ± 1.5   | 9.1 ± 3.1   | 8.2 ± 2.5   | 11.9 ± 8.5  | 9.1 ± 4.7      |
| L3           | 9.4 ± 1.6   | 11.5 ± 4.9  | 12.0 ± 4.9  | 15.0 ± 8.8  | 12.0 ± 5.8     |
| L4           | 17.4 ± 3.9  | 19.6 ± 10.2 | 19.9 ± 7.8  | 23.1 ± 14.2 | 20.0 ± 9.6     |
| L5           | 34.6 ± 4.8  | 36.8 ± 13.2 | 36.5 ± 9.0  | 39.8 ± 13.4 | 36.9 ± 10.4    |
| All (L1–L5)  | 12.4 ± 1.6  | 14.5 ± 4.9  | 14.1 ± 3.7  | 17.6 ± 9.2  | 14.7 ± 5.7     |
| Men          |             |             |             |             |                |
| MF + ES      |             |             |             |             |                |
| L1           | 6.3 ± 0.7   | 8.6 ± 2.4   | 9.3 ± 2.3   | 8.7 ± 2.3   | 8.2 ± 2.3      |
| L2           | 6.5 ± 0.6   | 9.0 ± 2.5   | 8.9 ± 2.2   | 10.5 ± 2.9  | 8.7 ± 2.6      |
| L3           | 8.1 ± 1.1   | 10.8 ± 2.4  | 10.9 ± 2.2  | 13.2 ± 3.9  | 10.7 ± 3.1     |
| L4           | 11.0 ± 1.8  | 16.3 ± 5.6  | 14.7 ± 3.5  | 19.0 ± 6.2  | 15.3 ± 5.3     |
| L5           | 18.1 ± 5.0  | 28.2 ± 7.5  | 26.5 ± 6.6  | 29.7 ± 8.0  | 25.7 ± 8.0     |
| All (L1–L5)  | 9.4 ± 1.5   | 14.0 ± 3.8  | 13.3 ± 2.9  | 15.5 ± 4.1  | 14.7 ± 7.8     |
| MF           |             |             |             |             |                |
| L1           | 9.7 ± 1.7   | 14.4 ± 5.3  | 16.9 ± 5.9  | 16.1 ± 3.9  | 14.3 ± 5.2     |
| L2           | 8.2 ± 1.3   | 12.0 ± 4.0  | 13.2 ± 5.9  | 16.3 ± 5.2  | 12.4 ± 5.2     |
| L3           | 8.7 ± 1.0   | 12.3 ± 3.4  | 13.7 ± 5.4  | 17.8 ± 6.1  | 13.1 ± 5.4     |
| L4           | 11.8 ± 1.9  | 17.5 ± 6.3  | 16.1 ± 4.5  | 21.2 ± 6.3  | 16.7 ± 6.0     |
| L5           | 17.5 ± 5.2  | 27.5 ± 7.1  | 26.6 ± 7.0  | 29.3 ± 7.7  | 25.2 ± 8.0     |
| All (L1–L5)  | 12.3 ± 2.4  | 18.6 ± 5.2  | 18.9 ± 5.0  | 22.2 ± 5.8  | 18.0 ± 5.9     |
| ES           |             |             |             |             |                |
| L1           | 5.6 ± 1.0   | 7.4 ± 1.9   | 7.9 ± 1.7   | 7.2 ± 1.9   | 7.0 ± 1.8      |
| L2           | 6.0 ± 0.8   | 8.1 ± 2.2   | 8.1 ± 1.6   | 9.2 ± 2.5   | 7.9 ± 2.2      |
| L3           | 7.8 ± 1.4   | 10.2 ± 2.2  | 10.0 ± 1.6  | 11.2 ± 2.8  | 9.8 ± 2.4      |
| L4           | 10.4 ± 1.9  | 15.4 ± 5.2  | 13.6 ± 3.3  | 17.2 ± 5.6  | 14.1 ± 4.8     |
| L5           | 20.6 ± 5.8  | 31.1 ± 9.8  | 26.9 ± 8.2  | 30.9 ± 10.3 | 27.4 ± 9.4     |
| All (L1–L5)  | 7.8 ± 1.1   | 11.3 ± 3.0  | 10.6 ± 1.8  | 11.8 ± 2.9  | 10.4 ± 2.7     |

<sup>a</sup>Data are means.

**On-line Table 2: Volume (cm<sup>3</sup>) of lumbar multifidus and erector spinae according to sex, age group, and lumbar level<sup>a</sup>**

| Lumbar Level   | 20–29 Years   | 30–39 Years  | 40–49 Years   | 50–62 Years   | All Age Groups |
|----------------|---------------|--------------|---------------|---------------|----------------|
| <b>Women</b>   |               |              |               |               |                |
| <b>MF + ES</b> |               |              |               |               |                |
| L1             | 89.5 ± 14.2   | 92.3 ± 11.0  | 92.2 ± 17.5   | 92.3 ± 12.3   | 91.6 ± 13.5    |
| L2             | 105.6 ± 17.8  | 104.0 ± 15.2 | 109.6 ± 17.1  | 107.8 ± 15.2  | 106.7 ± 15.9   |
| L3             | 114.8 ± 24.2  | 126.6 ± 16.1 | 128.1 ± 28.8  | 129.3 ± 17.0  | 124.5 ± 22.2   |
| L4             | 141.7 ± 24.9  | 149.2 ± 18.4 | 151.5 ± 35.3  | 136.8 ± 28.0  | 144.8 ± 26.9   |
| L5             | 97.9 ± 22.9   | 102.9 ± 31.4 | 103.0 ± 18.2  | 107.2 ± 23.3  | 102.8 ± 23.7   |
| All (L1–L5)    | 548.8 ± 92.5  | 575.1 ± 62.2 | 584.4 ± 101.0 | 553.4 ± 82.8  | 565.4 ± 83.8   |
| <b>MF</b>      |               |              |               |               |                |
| L1             | 16.9 ± 2.9    | 18.1 ± 3.0   | 17.2 ± 2.9    | 17.6 ± 3.3    | 17.4 ± 2.9     |
| L2             | 24.2 ± 9.1    | 23.2 ± 6.7   | 24.9 ± 4.0    | 25.2 ± 4.9    | 24.4 ± 6.3     |
| L3             | 36.5 ± 12.3   | 40.2 ± 7.2   | 39.8 ± 12.1   | 38.8 ± 10.2   | 38.8 ± 10.3    |
| L4             | 59.8 ± 12.6   | 63.9 ± 7.6   | 68.2 ± 18.2   | 61.5 ± 12.8   | 63.7 ± 13.2    |
| L5             | 70.1 ± 15.9   | 69.5 ± 14.2  | 72.0 ± 13.3   | 70.4 ± 16.0   | 70.4 ± 14.3    |
| All (L1–L5)    | 207.5 ± 45.7  | 216.4 ± 21.0 | 222.2 ± 40.2  | 209.1 ± 32.2  | 213.8 ± 35.1   |
| <b>ES</b>      |               |              |               |               |                |
| L1             | 72.6 ± 12.3   | 74.2 ± 9.0   | 75.0 ± 15.4   | 74.7 ± 12.4   | 74.1 ± 12.0    |
| L2             | 81.4 ± 14.6   | 80.8 ± 13.9  | 84.6 ± 15.5   | 82.6 ± 12.9   | 82.3 ± 13.8    |
| L3             | 77.6 ± 21.0   | 86.5 ± 13.2  | 88.3 ± 23.9   | 90.5 ± 13.4   | 85.7 ± 18.5    |
| L4             | 81.9 ± 15.9   | 83.8 ± 15.5  | 83.3 ± 20.9   | 75.4 ± 20.3   | 81.1 ± 17.9    |
| L5             | 27.8 ± 11.9   | 33.4 ± 18.2  | 31.1 ± 17.3   | 36.8 ± 9.7    | 32.3 ± 14.5    |
| All (L1–L5)    | 341.3 ± 60.9  | 358.7 ± 50.3 | 362.2 ± 71.2  | 344.3 ± 61.3  | 351.6 ± 59.7   |
| <b>Men</b>     |               |              |               |               |                |
| <b>MF + ES</b> |               |              |               |               |                |
| L1             | 158.7 ± 23.7  | 152.8 ± 19.5 | 142.9 ± 23.1  | 141.4 ± 32.0  | 148.9 ± 25.1   |
| L2             | 181.6 ± 27.9  | 172.8 ± 19.9 | 171.2 ± 28.7  | 167.5 ± 29.2  | 173.3 ± 26.1   |
| L3             | 190.3 ± 24.0  | 189.2 ± 28.1 | 182.5 ± 37.5  | 181.8 ± 29.9  | 186.0 ± 29.4   |
| L4             | 187.8 ± 37.0  | 199.0 ± 19.2 | 183.3 ± 27.2  | 181.6 ± 21.9  | 187.9 ± 27.0   |
| L5             | 105.5 ± 35.2  | 124.4 ± 16.5 | 115.2 ± 20.6  | 117.1 ± 35.9  | 115.6 ± 28.1   |
| All (L1–L5)    | 823.9 ± 101.6 | 838.1 ± 74.1 | 795.1 ± 117.9 | 789.5 ± 104.6 | 811.6 ± 98.9   |
| <b>MF</b>      |               |              |               |               |                |
| L1             | 26.7 ± 4.4    | 27.1 ± 3.7   | 22.3 ± 3.8    | 22.7 ± 4.9    | 24.7 ± 4.6     |
| L2             | 39.4 ± 11.3   | 39.9 ± 11.9  | 29.1 ± 5.5    | 29.9 ± 7.5    | 34.6 ± 10.4    |
| L3             | 56.6 ± 13.3   | 56.6 ± 17.0  | 47.0 ± 8.2    | 49.8 ± 11.7   | 52.5 ± 13.2    |
| L4             | 84.0 ± 16.7   | 88.7 ± 8.1   | 75.9 ± 12.4   | 83.5 ± 16.2   | 83.0 ± 14.1    |
| L5             | 79.4 ± 19.0   | 93.7 ± 8.5   | 86.3 ± 15.1   | 87.8 ± 15.8   | 86.8 ± 15.4    |
| All (L1–L5)    | 286.0 ± 35.1  | 306.3 ± 34.5 | 260.5 ± 38.1  | 273.8 ± 46.0  | 281.7 ± 40.9   |
| <b>ES</b>      |               |              |               |               |                |
| L1             | 131.9 ± 21.1  | 125.6 ± 18.4 | 120.6 ± 20.1  | 118.6 ± 27.8  | 124.2 ± 21.9   |
| L2             | 142.2 ± 23.6  | 132.8 ± 15.4 | 142.1 ± 23.7  | 137.6 ± 23.0  | 138.7 ± 21.2   |
| L3             | 133.8 ± 21.9  | 132.6 ± 21.9 | 125.5 ± 31.3  | 132.1 ± 24.8  | 133.4 ± 24.3   |
| L4             | 103.8 ± 34.1  | 110.2 ± 15.2 | 107.5 ± 16.4  | 98.1 ± 28.2   | 104.9 ± 24.2   |
| L5             | 26.1 ± 18.8   | 30.7 ± 10.9  | 28.9 ± 10.0   | 29.3 ± 27.8   | 28.8 ± 17.7    |
| All (L1–L5)    | 537.9 ± 86.9  | 531.8 ± 54.9 | 534.6 ± 85.8  | 515.7 ± 82.1  | 530.0 ± 75.9   |

<sup>a</sup>Data are means.
